# Supplementary material for: A molecular electron density theory (MEDT) study of the role of halogens (X2= F2, Cl2, Br2and I2) on the aza-Michael-addition reactions
Source: Royal Society of Chemistry journal article supplement (doi:10.1039/d0nj04203j), 2020-01-01
Supplement: d0nj04203j1.pdf [file d0nj04203j1.pdf]

## Supporting information

### A Molecular Electron Density Theory (MEDT) study of the role of halogens ( $X_2 = F_2, Cl_2, Br_2$ and $I_2$ ) on the aza-Michael-addition reactions

Luis R. Domingo<sup>a†</sup>, Ahmad Seif<sup>a,b†</sup>, Elham Mazarei<sup>a</sup>, Ehasn Zahedi<sup>c</sup>, Temer S. Ahmadi<sup>d</sup>

<sup>a</sup> Department of Organic Chemistry, University of Valencia, Dr. Moliner 50, 46100 Burjassot, Valencia, Spain

<sup>b</sup> Department of Chemistry, Central Tehran Branch, Islamic Azad University, Tehran, Iran

<sup>c</sup> Department of Chemistry, Shahrood Branch, Islamic Azad University, Shahrood, Iran

<sup>d</sup> Department of Chemistry, Villanova University, Villanova, PA, 19085, USA

#### Table of contents

|                 |                                                                                                                                                                                                                                                                                                                                          |     |
|-----------------|------------------------------------------------------------------------------------------------------------------------------------------------------------------------------------------------------------------------------------------------------------------------------------------------------------------------------------------|-----|
| <b>Table S1</b> | Optimized cartesian coordinates for all TSs at MN15-L/def2-TZVP and MN15-L /aug-cc-pVTZ levels of theory at gas phase                                                                                                                                                                                                                    | S2  |
| <b>Table S2</b> | Optimized cartesian coordinates for all TSs at MN15-L/def2-TZVP and MN15-L /aug-cc-pVTZ levels of theory at solvent phase                                                                                                                                                                                                                | S7  |
| <b>Table S3</b> | The rate constant ( $\text{cm}^3 \cdot \text{molecule}^{-1} \cdot \text{s}^{-1}$ ) and tunneling corrections calculated at room temperature for the uncatalyzed/dihalogen $I_2$ molecules-catalyzed nucleophilic attack of PYR $R_1$ and on the $\beta$ conjugated carbon MA $R_2-I_2$ in the DMC at MN15-L/aug-cc-pVTZ Level of theory. | S13 |
| <b>Table S4</b> | MN15-L/def2-TZVP global CDFT reactivity indices (in eV) at the GS of the reagents involved in the MAR. The values including DCM solvent effects are reported in parentheses.                                                                                                                                                             | S13 |

---

† Corresponding author.

E-mail address: domingo@utopia.uv.es

† Corresponding author.

E-mail address: ahmaseif@yahoo.com

**Table S1.** Cartesian coordinates for all TSs at MN15-L/def2-TZVP and MN15-L/aug-cc-pVTZ levels of theory at gas phase

**Cartesian coordinate for TS at uncatalyzed reaction at MN15-L/ def2-TZVP level of theory**

|   |             |             |             |
|---|-------------|-------------|-------------|
| C | 2.95967000  | -1.05476000 | -0.36350800 |
| C | 3.50617100  | 0.38024500  | -0.33032600 |
| C | 1.53681500  | -0.82064400 | -0.87316500 |
| H | 2.92591500  | -1.48008600 | 0.65692700  |
| H | 3.53993900  | -1.73695000 | -1.00209200 |
| N | 1.11453800  | 0.35976400  | -0.09162100 |
| H | 1.53825700  | -0.59138500 | -1.95519500 |
| H | 0.81392200  | -1.63402000 | -0.68226100 |
| C | 2.31352300  | 1.18651400  | 0.21737400  |
| H | 2.36551600  | 1.30069800  | 1.31854400  |
| H | 2.22482900  | 2.19355700  | -0.21998700 |
| H | 3.74498500  | 0.70571200  | -1.35869200 |
| H | 4.41221100  | 0.50283600  | 0.28324700  |
| C | 0.20870600  | -0.11865700 | 1.37651200  |
| C | -0.99771300 | -0.77591200 | 1.02704100  |
| H | 0.13174600  | 0.92081700  | 1.74069300  |
| H | 0.96839600  | -0.69632300 | 1.92651100  |
| C | -1.92432500 | 0.00692200  | 0.28253800  |
| O | -1.69947800 | 1.15827100  | -0.13830400 |
| O | -3.10852300 | -0.61643100 | 0.01138500  |
| C | -4.00957300 | 0.13850700  | -0.78784800 |
| H | -3.56399200 | 0.39107200  | -1.76632300 |
| H | -4.29548000 | 1.08056500  | -0.28919800 |
| H | -4.89503900 | -0.49890900 | -0.92877700 |
| H | -1.14066400 | -1.84819100 | 1.15837200  |
| H | 0.33204900  | 0.88425400  | -0.51677400 |

**Cartesian coordinate for TS at F<sub>2</sub> catalyzed reaction at MN15-L/ def2-TZVP level of theory**

|   |             |             |             |
|---|-------------|-------------|-------------|
| C | 2.91284600  | -0.02310100 | -1.25514700 |
| C | 3.71885800  | 0.06315200  | 0.05231000  |
| C | 1.55958600  | 0.53489300  | -0.81422000 |
| H | 2.79582900  | -1.07489800 | -1.57587300 |
| H | 3.36384000  | 0.54042900  | -2.08507700 |
| N | 1.36729800  | -0.14036600 | 0.48036700  |
| H | 1.59635800  | 1.63153000  | -0.67959700 |
| H | 0.70355100  | 0.29261400  | -1.46937300 |
| C | 2.68469700  | -0.30437800 | 1.14059500  |
| H | 2.77907200  | -1.35812500 | 1.47082700  |
| H | 2.76619100  | 0.33253800  | 2.03703400  |
| H | 4.06367200  | 1.10157200  | 0.19972300  |
| H | 4.60355400  | -0.59144800 | 0.07571300  |
| C | 0.49560900  | -1.83836200 | 0.25098000  |
| C | -0.66451000 | -1.69798300 | -0.52403900 |
| H | 0.38546000  | -1.93214800 | 1.33957700  |
| H | 1.34253200  | -2.40374400 | -0.15973400 |
| C | -1.73974300 | -0.95469000 | 0.04967400  |
| O | -1.69770400 | -0.42201300 | 1.17744900  |
| O | -2.82519900 | -0.82639600 | -0.74857600 |
| C | -3.88612200 | -0.03949600 | -0.20540700 |
| H | -3.54553000 | 0.98746700  | 0.00524400  |

|   |             |             |             |
|---|-------------|-------------|-------------|
| H | -4.26710900 | -0.48350100 | 0.72946900  |
| H | -4.67340500 | -0.03358800 | -0.97237300 |
| H | -0.70264900 | -1.98970900 | -1.57455700 |
| H | 0.64872300  | 0.31090700  | 1.05669900  |
| F | -1.11074200 | 1.63517200  | 0.41888700  |
| F | -0.63762400 | 2.94257700  | -0.12552500 |

**Cartesian coordinate for TS at Cl<sub>2</sub> catalyzed reaction at MN15-L/ def2-TZVP level of theory**

|    |             |             |             |
|----|-------------|-------------|-------------|
| C  | -3.19306800 | -0.06466100 | 1.20480000  |
| C  | -3.89340300 | 0.14081400  | -0.14810600 |
| C  | -1.74540600 | 0.27426400  | 0.84990100  |
| H  | -3.26218200 | -1.12099300 | 1.52465500  |
| H  | -3.59775000 | 0.56532700  | 2.01032400  |
| N  | -1.57569600 | -0.42711800 | -0.43898700 |
| H  | -1.60639000 | 1.36424100  | 0.71731600  |
| H  | -0.97541900 | -0.09678500 | 1.54993900  |
| C  | -2.87654500 | -0.42437600 | -1.16194300 |
| H  | -3.10818700 | -1.46962400 | -1.44675600 |
| H  | -2.81462700 | 0.16889700  | -2.08821600 |
| H  | -4.03883300 | 1.22125700  | -0.32372600 |
| H  | -4.87627500 | -0.34930400 | -0.22343500 |
| C  | -0.93767100 | -2.14164400 | -0.20212900 |
| C  | 0.24059300  | -2.17289000 | 0.57258600  |
| H  | -0.83924700 | -2.29912700 | -1.28728300 |
| H  | -1.83966200 | -2.61066300 | 0.21681400  |
| C  | 1.42254900  | -1.63933300 | -0.00829200 |
| O  | 1.47658500  | -1.06776000 | -1.12108200 |
| O  | 2.53333000  | -1.76672000 | 0.76395500  |
| C  | 3.73826100  | -1.26403600 | 0.19292700  |
| H  | 3.68193100  | -0.17444300 | 0.02888400  |
| H  | 3.95342000  | -1.75192500 | -0.77259500 |
| H  | 4.53028700  | -1.49363200 | 0.92009600  |
| H  | 0.23971700  | -2.49308300 | 1.61485600  |
| H  | -0.79248600 | -0.05150200 | -0.98607500 |
| Cl | 1.30844800  | 1.40738100  | -0.41210700 |
| Cl | 0.91298600  | 3.29898400  | 0.21661700  |

**Cartesian coordinate for TS at Br<sub>2</sub> catalyzed reaction at MN15-L/ def2-TZVP level of theory**

|   |            |             |             |
|---|------------|-------------|-------------|
| C | 3.08142400 | -1.80301300 | 1.23662700  |
| C | 3.43213000 | -2.49317500 | -0.09151900 |
| C | 1.75602300 | -1.12733300 | 0.88666700  |
| H | 3.83549700 | -1.03448100 | 1.48969200  |
| H | 3.00001700 | -2.49729400 | 2.08561600  |
| N | 2.04766400 | -0.55947500 | -0.44567300 |
| H | 0.92954500 | -1.86130900 | 0.81926000  |
| H | 1.44261800 | -0.30599400 | 1.55552400  |
| C | 2.99796500 | -1.46022000 | -1.15322200 |
| H | 3.84784300 | -0.84640200 | -1.51089500 |
| H | 2.52445300 | -1.92152900 | -2.03460700 |
| H | 2.83081900 | -3.41341700 | -0.19480000 |
| H | 4.49330800 | -2.77020700 | -0.18606200 |
| C | 2.72788200 | 1.17552600  | -0.31996600 |
| C | 1.95842600 | 2.00940600  | 0.51387100  |
| H | 2.64932200 | 1.32669300  | -1.40639200 |
| H | 3.74485100 | 0.92032900  | 0.00892800  |

|    |             |             |             |
|----|-------------|-------------|-------------|
| C  | 0.69914800  | 2.46186700  | 0.03816500  |
| O  | 0.17355600  | 2.11192600  | -1.04683100 |
| O  | 0.06177200  | 3.31860700  | 0.87368400  |
| C  | -1.18574300 | 3.82676800  | 0.40481200  |
| H  | -1.93163000 | 3.02124400  | 0.29554900  |
| H  | -1.06686900 | 4.33023700  | -0.56898900 |
| H  | -1.51868000 | 4.54473400  | 1.16759000  |
| H  | 2.26792800  | 2.24909000  | 1.53187300  |
| H  | 1.19023600  | -0.36611500 | -0.97480200 |
| Br | -1.38665100 | 0.16944200  | -0.41469500 |
| Br | -2.53503600 | -1.78208400 | 0.22426100  |

**Cartesian coordinate for TS at I<sub>2</sub> catalyzed reaction at MN15-L/ def2-TZVP level of theory**

|   |             |             |             |
|---|-------------|-------------|-------------|
| C | 3.23136300  | -2.33442500 | 1.34366200  |
| C | 3.64990000  | -3.15054500 | 0.08944600  |
| C | 1.91592200  | -1.66067000 | 0.93906600  |
| H | 3.97788500  | -1.55106100 | 1.56310100  |
| H | 3.12372300  | -2.95463600 | 2.24508500  |
| N | 2.14196500  | -1.40406700 | -0.49437000 |
| H | 1.03667000  | -2.32166600 | 1.06312100  |
| H | 1.72039700  | -0.70343200 | 1.45122600  |
| C | 2.72670200  | -2.64192800 | -1.04695000 |
| H | 3.26086000  | -2.40445000 | -1.98406000 |
| H | 1.92672400  | -3.36821300 | -1.27779900 |
| H | 3.51247000  | -4.23241100 | 0.23784200  |
| H | 4.71174200  | -2.98952400 | -0.15604100 |
| C | 3.31005600  | 0.02355300  | -0.74896100 |
| C | 3.15399900  | 1.06040700  | 0.19340700  |
| H | 2.96011500  | 0.22380500  | -1.77112700 |
| H | 4.23925600  | -0.56266100 | -0.71295900 |
| C | 2.12649400  | 2.01767600  | 0.00119000  |
| O | 1.30768900  | 2.02541000  | -0.95490500 |
| O | 2.08034000  | 2.98151500  | 0.95233600  |
| C | 1.08773200  | 3.98972900  | 0.76668900  |
| H | 0.07068900  | 3.56486500  | 0.82846500  |
| H | 1.20407800  | 4.48561900  | -0.21098500 |
| H | 1.24187400  | 4.71041100  | 1.58196300  |
| H | 3.76828300  | 1.11149300  | 1.09454500  |
| H | 1.28245600  | -1.10148300 | -0.97009300 |
| I | -0.87720900 | 0.75337600  | -0.39169300 |
| I | -3.03502200 | -0.86576000 | 0.22704400  |

**Cartesian coordinate for TS at uncatalyzed reaction at MN15-L/aug-cc-pVTZ level of theory**

|   |            |             |             |
|---|------------|-------------|-------------|
| C | 2.97475800 | -1.06716300 | -0.32468500 |
| C | 3.52291100 | 0.36745200  | -0.32815400 |
| C | 1.55537800 | -0.84831300 | -0.84983200 |
| H | 2.93415600 | -1.46368400 | 0.70630800  |
| H | 3.55749600 | -1.76596100 | -0.94147900 |
| N | 1.12929900 | 0.35901300  | -0.11214300 |
| H | 1.56258800 | -0.65621500 | -1.93818000 |
| H | 0.83233500 | -1.65409800 | -0.63402600 |
| C | 2.32734700 | 1.19116700  | 0.18470100  |
| H | 2.37007100 | 1.33520900  | 1.28199100  |
| H | 2.24461600 | 2.18432700  | -0.28242000 |
| H | 3.77140900 | 0.66272400  | -1.36261300 |

|   |             |             |             |
|---|-------------|-------------|-------------|
| H | 4.42211800  | 0.50542600  | 0.29100300  |
| C | 0.20161100  | -0.06817000 | 1.36934400  |
| C | -0.99955100 | -0.73902900 | 1.03558600  |
| H | 0.12216400  | 0.98376400  | 1.69020200  |
| H | 0.95947700  | -0.62512900 | 1.94095300  |
| C | -1.93666600 | 0.01912400  | 0.27629100  |
| O | -1.72358300 | 1.16072600  | -0.17439900 |
| O | -3.11671100 | -0.62160300 | 0.02910600  |
| C | -4.03575300 | 0.10444600  | -0.77727200 |
| H | -3.60367000 | 0.33507800  | -1.76596300 |
| H | -4.32276400 | 1.05451500  | -0.29716100 |
| H | -4.91502800 | -0.54538800 | -0.88956400 |
| H | -1.13989500 | -1.80655600 | 1.20078100  |
| H | 0.36198400  | 0.87283000  | -0.56837100 |

**Cartesian coordinate for TS at F<sub>2</sub>-catalyzed reaction at MN15-L/aug-cc-pVTZ level of theory**

|   |             |             |             |
|---|-------------|-------------|-------------|
| C | -2.63663200 | -0.29860700 | 1.38101500  |
| C | -3.59037800 | -0.43861200 | 0.16139400  |
| C | -1.49949500 | 0.59375400  | 0.87062700  |
| H | -2.22463200 | -1.28139900 | 1.66690800  |
| H | -3.13344600 | 0.12506600  | 2.26516300  |
| N | -1.41202800 | 0.18667100  | -0.53886100 |
| H | -1.74495400 | 1.66919700  | 0.93795000  |
| H | -0.52619800 | 0.42429100  | 1.36004000  |
| C | -2.79114800 | 0.12427000  | -1.04234500 |
| H | -2.82717900 | -0.52184000 | -1.93719800 |
| H | -3.14629800 | 1.13161400  | -1.32814500 |
| H | -4.52232400 | 0.12865100  | 0.30246800  |
| H | -3.87221700 | -1.48996800 | -0.00600100 |
| C | -0.57960200 | -1.57193800 | -0.69867400 |
| C | 0.51062300  | -1.68079500 | 0.17217100  |
| H | -0.37411900 | -1.39444200 | -1.75998200 |
| H | -1.48248800 | -2.16207800 | -0.50079800 |
| C | 1.69393100  | -0.95618500 | -0.16780000 |
| O | 1.83365300  | -0.29280900 | -1.21517200 |
| O | 2.67215300  | -1.01118200 | 0.76472300  |
| C | 3.83904900  | -0.24210400 | 0.46361800  |
| H | 3.58084000  | 0.82147300  | 0.33950400  |
| H | 4.31655400  | -0.60192300 | -0.46174900 |
| H | 4.51196000  | -0.38010900 | 1.32024200  |
| H | 0.42572300  | -2.15388300 | 1.15222800  |
| H | -0.77285300 | 0.77585800  | -1.08132700 |
| F | 1.19291400  | 1.63858100  | -0.38623800 |
| F | 0.57945200  | 2.90097800  | 0.19360300  |

**Cartesian coordinate for TS at Cl<sub>2</sub>-catalyzed reaction at MN15-L/aug-cc-pVTZ level of theory**

|   |             |             |             |
|---|-------------|-------------|-------------|
| C | -3.19490000 | -0.05525300 | 1.20820600  |
| C | -3.90573500 | 0.12934200  | -0.14226200 |
| C | -1.75104700 | 0.28643500  | 0.84162500  |
| H | -3.25598900 | -1.10706300 | 1.54192900  |
| H | -3.59710400 | 0.58399900  | 2.00668700  |
| N | -1.58582400 | -0.42277300 | -0.44341000 |
| H | -1.61676200 | 1.37527000  | 0.70115100  |
| H | -0.97773700 | -0.07793600 | 1.54025900  |
| C | -2.88997600 | -0.43303300 | -1.15861000 |

|    |             |             |             |
|----|-------------|-------------|-------------|
| H  | -3.11642400 | -1.48033300 | -1.43713900 |
| H  | -2.83702100 | 0.15747300  | -2.08635600 |
| H  | -4.06503000 | 1.20561400  | -0.32687800 |
| H  | -4.88203000 | -0.37397400 | -0.20535500 |
| C  | -0.93485000 | -2.14318500 | -0.19759100 |
| C  | 0.24117500  | -2.16637100 | 0.57765300  |
| H  | -0.83591700 | -2.29963800 | -1.28144700 |
| H  | -1.83658800 | -2.60743500 | 0.22434300  |
| C  | 1.42747000  | -1.64413600 | -0.00809600 |
| O  | 1.48861200  | -1.09321400 | -1.12986400 |
| O  | 2.53247200  | -1.75641100 | 0.77497700  |
| C  | 3.74400100  | -1.26682600 | 0.20553500  |
| H  | 3.68849100  | -0.18150700 | 0.02085500  |
| H  | 3.96488700  | -1.77456100 | -0.74721300 |
| H  | 4.52713200  | -1.48396800 | 0.94461800  |
| H  | 0.23782500  | -2.47224500 | 1.62382000  |
| H  | -0.81130200 | -0.04509400 | -0.99753500 |
| Cl | 1.31774400  | 1.41029600  | -0.42850400 |
| Cl | 0.91336400  | 3.30123200  | 0.22041400  |

**Cartesian coordinate for TS at Br<sub>2</sub>-catalyzed reaction at MN15-L/aug-cc-pVTZ level of theory**

|    |             |             |             |
|----|-------------|-------------|-------------|
| C  | 3.07054100  | -1.81566300 | 1.23463800  |
| C  | 3.43676900  | -2.48997100 | -0.09746900 |
| C  | 1.75037500  | -1.13303400 | 0.87913800  |
| H  | 3.82196500  | -1.05188800 | 1.50634900  |
| H  | 2.97668900  | -2.52097600 | 2.07226600  |
| N  | 2.05345800  | -0.55505300 | -0.44599200 |
| H  | 0.92256100  | -1.86313300 | 0.80002200  |
| H  | 1.43669000  | -0.31655200 | 1.55253100  |
| C  | 3.00894800  | -1.44873200 | -1.15339100 |
| H  | 3.86103900  | -0.83254900 | -1.49947300 |
| H  | 2.54142800  | -1.90365100 | -2.04040200 |
| H  | 2.84097400  | -3.41112400 | -0.21622700 |
| H  | 4.49983800  | -2.75986100 | -0.18343900 |
| C  | 2.73509900  | 1.18788700  | -0.30175500 |
| C  | 1.95630400  | 2.01388800  | 0.52864200  |
| H  | 2.66510000  | 1.34063400  | -1.38736900 |
| H  | 3.74602600  | 0.92703900  | 0.03776300  |
| C  | 0.70080500  | 2.46924300  | 0.04127600  |
| O  | 0.18899900  | 2.13057300  | -1.05236800 |
| O  | 0.05095000  | 3.31270600  | 0.88150400  |
| C  | -1.19343500 | 3.82480900  | 0.40814000  |
| H  | -1.93373700 | 3.01807100  | 0.28111600  |
| H  | -1.06454000 | 4.34137700  | -0.55637200 |
| H  | -1.53389400 | 4.53027100  | 1.17792100  |
| H  | 2.25232000  | 2.24296800  | 1.55259400  |
| H  | 1.20245900  | -0.35766500 | -0.98032400 |
| Br | -1.39701800 | 0.16426700  | -0.42578200 |
| Br | -2.52644400 | -1.78410600 | 0.22968500  |

**Cartesian coordinate for TS at I<sub>2</sub>-catalyzed reaction at MN15-L/Aug.-cc-pVTZ for all atoms except I<sub>2</sub> and MN15-L/aug-cc-pVTZ-Lan12dZ for I<sub>2</sub> level of theory**

|   |            |             |            |
|---|------------|-------------|------------|
| C | 3.23136300 | -2.33442500 | 1.34366200 |
| C | 3.64990000 | -3.15054500 | 0.08944600 |
| C | 1.91592200 | -1.66067000 | 0.93906600 |

|   |             |             |             |
|---|-------------|-------------|-------------|
| H | 3.97788500  | -1.55106100 | 1.56310100  |
| H | 3.12372300  | -2.95463600 | 2.24508500  |
| N | 2.14196500  | -1.40406700 | -0.49437000 |
| H | 1.03667000  | -2.32166600 | 1.06312100  |
| H | 1.72039700  | -0.70343200 | 1.45122600  |
| C | 2.72670200  | -2.64192800 | -1.04695000 |
| H | 3.26086000  | -2.40445000 | -1.98406000 |
| H | 1.92672400  | -3.36821300 | -1.27779900 |
| H | 3.51247000  | -4.23241100 | 0.23784200  |
| H | 4.71174200  | -2.98952400 | -0.15604100 |
| C | 3.31005600  | 0.02355300  | -0.74896100 |
| C | 3.15399900  | 1.06040700  | 0.19340700  |
| H | 2.96011500  | 0.22380500  | -1.77112700 |
| H | 4.23925600  | -0.56266100 | -0.71295900 |
| C | 2.12649400  | 2.01767600  | 0.00119000  |
| O | 1.30768900  | 2.02541000  | -0.95490500 |
| O | 2.08034000  | 2.98151500  | 0.95233600  |
| C | 1.08773200  | 3.98972900  | 0.76668900  |
| H | 0.07068900  | 3.56486500  | 0.82846500  |
| H | 1.20407800  | 4.48561900  | -0.21098500 |
| H | 1.24187400  | 4.71041100  | 1.58196300  |
| H | 3.76828300  | 1.11149300  | 1.09454500  |
| H | 1.28245600  | -1.10148300 | -0.97009300 |
| I | -0.87720900 | 0.75337600  | -0.39169300 |
| I | -3.03502200 | -0.86576000 | 0.22704400  |

**Table S2.** Cartesian coordinates for all TSs at MN15-L/def2-TZVP and MN15-L/aug-cc-pVTZ levels of theory at solvent phase

| <u>Cartesian coordinate for TS at uncatalyzed reaction at MN15-L/ def2-TZVP level of theory</u> |             |             |             |
|-------------------------------------------------------------------------------------------------|-------------|-------------|-------------|
| C                                                                                               | 3.09139600  | -1.11943500 | 0.04696800  |
| C                                                                                               | 3.70472900  | 0.25831600  | -0.24066100 |
| C                                                                                               | 1.75925000  | -1.01253800 | -0.69592600 |
| H                                                                                               | 2.90750000  | -1.23877000 | 1.13136000  |
| H                                                                                               | 3.70621700  | -1.96360700 | -0.29927800 |
| N                                                                                               | 1.30710000  | 0.34922200  | -0.34413000 |
| H                                                                                               | 1.91219000  | -1.10512500 | -1.78748100 |
| H                                                                                               | 0.98821100  | -1.74008500 | -0.38341100 |
| C                                                                                               | 2.49933000  | 1.19898600  | -0.07447200 |
| H                                                                                               | 2.42144200  | 1.57085300  | 0.96718400  |
| H                                                                                               | 2.52129900  | 2.07110000  | -0.74625300 |
| H                                                                                               | 4.06898600  | 0.28781800  | -1.28339400 |
| H                                                                                               | 4.53957200  | 0.52596300  | 0.42548400  |
| C                                                                                               | 0.14864600  | 0.28515500  | 1.19550400  |
| C                                                                                               | -1.01401400 | -0.46266600 | 0.97847300  |
| H                                                                                               | 0.06339300  | 1.38024200  | 1.21232200  |
| H                                                                                               | 0.91788100  | -0.11154700 | 1.87184700  |
| C                                                                                               | -2.08889700 | 0.12842000  | 0.23250800  |
| O                                                                                               | -2.11005700 | 1.25884100  | -0.26554800 |
| O                                                                                               | -3.16077200 | -0.71627800 | 0.10347200  |
| C                                                                                               | -4.26155500 | -0.19039800 | -0.63156900 |
| H                                                                                               | -3.96868100 | 0.07252700  | -1.66338800 |
| H                                                                                               | -4.67822800 | 0.70903400  | -0.14525200 |

|   |             |             |             |
|---|-------------|-------------|-------------|
| H | -5.02099300 | -0.98653700 | -0.65220900 |
| H | -1.07072800 | -1.52309000 | 1.23614900  |
| H | 0.67555900  | 0.75112600  | -1.04311900 |

**Cartesian coordinate for TS at F<sub>2</sub> catalyzed reaction at MN15-L/ def2-TZVP level of theory**

|   |             |             |             |
|---|-------------|-------------|-------------|
| C | -2.49868600 | -0.65585900 | 1.36909100  |
| C | -3.56032800 | -0.65313000 | 0.23446800  |
| C | -1.54614500 | 0.48809200  | 0.99763200  |
| H | -1.94075400 | -1.60839300 | 1.36979400  |
| H | -2.93817500 | -0.52319800 | 2.36907300  |
| N | -1.57716800 | 0.44506700  | -0.46393600 |
| H | -1.91898600 | 1.46536400  | 1.36769200  |
| H | -0.51102800 | 0.35164600  | 1.36019500  |
| C | -2.98026800 | 0.28265500  | -0.85498400 |
| H | -3.04119800 | -0.13579500 | -1.87567100 |
| H | -3.49914700 | 1.26251400  | -0.85617100 |
| H | -4.53479200 | -0.27865400 | 0.58419200  |
| H | -3.72179300 | -1.67005900 | -0.15862300 |
| C | -0.47562400 | -1.35405200 | -1.12338000 |
| C | 0.52441700  | -1.62247600 | -0.21272600 |
| H | -0.24066500 | -0.81141100 | -2.04295100 |
| H | -1.40598200 | -1.93093300 | -1.11747700 |
| C | 1.76282300  | -0.89447100 | -0.29437800 |
| O | 2.07615100  | -0.13280900 | -1.22946400 |
| O | 2.57860000  | -1.09142400 | 0.75675000  |
| C | 3.81062800  | -0.35604200 | 0.72965700  |
| H | 3.61320000  | 0.72804000  | 0.69568000  |
| H | 4.41906600  | -0.64314700 | -0.14381100 |
| H | 4.33361200  | -0.61998000 | 1.65914400  |
| H | 0.35912700  | -2.27116800 | 0.65202800  |
| H | -1.09860700 | 1.23277000  | -0.91070500 |
| F | 1.24941300  | 1.63640500  | -0.36741900 |
| F | 0.49585300  | 2.88831700  | 0.25681900  |

**Cartesian coordinate for TS at Cl<sub>2</sub> catalyzed reaction at MN15-L/ def2-TZVP level of theory**

|   |             |             |             |
|---|-------------|-------------|-------------|
| C | -2.95717500 | -0.15811100 | 1.39333300  |
| C | -3.97191400 | -0.15962300 | 0.21759400  |
| C | -1.73433800 | 0.58256300  | 0.83906100  |
| H | -2.66334400 | -1.19144800 | 1.64924700  |
| H | -3.35263800 | 0.31483000  | 2.30430900  |
| N | -1.75712300 | 0.18409500  | -0.57356000 |
| H | -1.83422400 | 1.68258100  | 0.92880700  |
| H | -0.78045900 | 0.27069900  | 1.30015300  |
| C | -3.15741500 | 0.30018900  | -1.01655800 |
| H | -3.31200800 | -0.32954100 | -1.91071300 |
| H | -3.38758000 | 1.34803000  | -1.28453000 |
| H | -4.81126100 | 0.52902800  | 0.39952300  |
| H | -4.39766800 | -1.16400900 | 0.06262500  |
| C | -1.17112000 | -1.69774200 | -0.77209400 |
| C | -0.16616900 | -2.06194600 | 0.12710600  |
| H | -0.89570600 | -1.52729800 | -1.81956900 |
| H | -2.18219200 | -2.09833200 | -0.62815600 |
| C | 1.19704100  | -1.74758900 | -0.16470600 |
| O | 1.62318200  | -1.18628400 | -1.19271600 |
| O | 2.05410300  | -2.12844500 | 0.82206300  |

|    |             |             |             |
|----|-------------|-------------|-------------|
| C  | 3.43693000  | -1.87328000 | 0.57310300  |
| H  | 3.63044800  | -0.79315000 | 0.45349700  |
| H  | 3.78329000  | -2.39893100 | -0.33314400 |
| H  | 3.97478900  | -2.25247800 | 1.45433000  |
| H  | -0.40582000 | -2.48051200 | 1.10850900  |
| H  | -1.10393700 | 0.71865900  | -1.15529300 |
| Cl | 1.61914300  | 1.26812800  | -0.41814000 |
| Cl | 1.42584900  | 3.17271300  | 0.25752300  |

**Cartesian coordinate for TS at Br<sub>2</sub> catalyzed reaction at MN15-L/ def2-TZVP level of theory**

|    |             |             |             |
|----|-------------|-------------|-------------|
| C  | 3.22912400  | -1.31376400 | 1.38189400  |
| C  | 4.00789300  | -1.94324400 | 0.19495900  |
| C  | 1.77731000  | -1.25011400 | 0.89270800  |
| H  | 3.58728100  | -0.28724300 | 1.57490900  |
| H  | 3.32886200  | -1.88643700 | 2.31575000  |
| N  | 1.95519400  | -0.99562400 | -0.54163400 |
| H  | 1.24029000  | -2.20709000 | 1.04979700  |
| H  | 1.18988700  | -0.43306900 | 1.34786800  |
| C  | 3.02107600  | -1.90526500 | -0.99767600 |
| H  | 3.46520300  | -1.51224900 | -1.92943600 |
| H  | 2.60289200  | -2.90733900 | -1.20744200 |
| H  | 4.31080600  | -2.98009400 | 0.40717100  |
| H  | 4.92343100  | -1.37144600 | -0.02621700 |
| C  | 2.54212400  | 0.89948300  | -0.84428900 |
| C  | 2.02555600  | 1.79900000  | 0.08888400  |
| H  | 2.11802300  | 0.89352200  | -1.85488200 |
| H  | 3.60324600  | 0.62883500  | -0.78920200 |
| C  | 0.73582900  | 2.37675100  | -0.10752100 |
| O  | -0.01941400 | 2.18307500  | -1.08687000 |
| O  | 0.36183200  | 3.21033000  | 0.89516100  |
| C  | -0.90157600 | 3.85861200  | 0.72926300  |
| H  | -1.72401400 | 3.12425300  | 0.68058600  |
| H  | -0.91616300 | 4.47284800  | -0.18687600 |
| H  | -1.02587000 | 4.49971800  | 1.61380600  |
| H  | 2.55250700  | 2.01385000  | 1.02252900  |
| H  | 1.08827100  | -1.09164700 | -1.07952000 |
| Br | -1.48472900 | 0.21627900  | -0.41380700 |
| Br | -2.66939600 | -1.70950900 | 0.25257700  |

**Cartesian coordinate for TS at I<sub>2</sub> catalyzed reaction at MN15-L/ def2-TZVP level of theory**

|   |            |             |             |
|---|------------|-------------|-------------|
| C | 3.44004200 | -2.14022800 | 1.36598200  |
| C | 3.95957900 | -2.96664900 | 0.15861800  |
| C | 2.04114800 | -1.68224700 | 0.93703300  |
| H | 4.07513200 | -1.25083100 | 1.52408300  |
| H | 3.42217000 | -2.71272500 | 2.30517700  |
| N | 2.21731100 | -1.48924100 | -0.50615300 |
| H | 1.27022800 | -2.45469100 | 1.13159500  |
| H | 1.71994200 | -0.73449700 | 1.40526900  |
| C | 2.97396900 | -2.65437600 | -0.99486000 |
| H | 3.47295100 | -2.39663000 | -1.94610100 |
| H | 2.29038700 | -3.50366800 | -1.18130500 |
| H | 3.96601400 | -4.04629200 | 0.37396300  |
| H | 4.98961500 | -2.67797300 | -0.10586600 |
| C | 3.29312400 | 0.18509800  | -0.85406800 |
| C | 3.09421000 | 1.18380700  | 0.09770500  |

|   |             |             |             |
|---|-------------|-------------|-------------|
| H | 2.83163000  | 0.30230700  | -1.84121000 |
| H | 4.23549200  | -0.37517500 | -0.84891900 |
| C | 2.02275400  | 2.11611000  | -0.04510100 |
| O | 1.20754200  | 2.16792700  | -0.99480200 |
| O | 1.95099700  | 3.00974500  | 0.97125200  |
| C | 0.93983000  | 4.01474700  | 0.85262200  |
| H | -0.06866400 | 3.56656000  | 0.83810500  |
| H | 1.08075700  | 4.61216600  | -0.06382400 |
| H | 1.05134000  | 4.65473500  | 1.73964900  |
| H | 3.69906200  | 1.23038500  | 1.00737300  |
| H | 1.33215400  | -1.34241800 | -1.00264000 |
| I | -0.92837000 | 0.70782200  | -0.39041800 |
| I | -3.04796200 | -0.93811400 | 0.22605100  |

**Cartesian coordinate for TS at uncatalyzed reaction at MN15-L/aug-cc-pVTZ level of theory**

|   |             |             |             |
|---|-------------|-------------|-------------|
| C | 3.10036100  | -1.12231500 | 0.06019800  |
| C | 3.71897500  | 0.25223900  | -0.23072100 |
| C | 1.77249500  | -1.01818900 | -0.69049400 |
| H | 2.90938100  | -1.23506400 | 1.14337800  |
| H | 3.71502400  | -1.96854100 | -0.27892100 |
| N | 1.32385700  | 0.34889200  | -0.35802600 |
| H | 1.92973900  | -1.12600200 | -1.77931800 |
| H | 0.99916000  | -1.73905900 | -0.37083100 |
| C | 2.51456900  | 1.19669700  | -0.08292500 |
| H | 2.43007200  | 1.57565700  | 0.95503400  |
| H | 2.54583800  | 2.06276600  | -0.76095600 |
| H | 4.09281400  | 0.27425800  | -1.26953500 |
| H | 4.54645600  | 0.52178500  | 0.44265800  |
| C | 0.13751800  | 0.30295400  | 1.19224400  |
| C | -1.01970600 | -0.44738600 | 0.97460300  |
| H | 0.05876300  | 1.39716600  | 1.18637800  |
| H | 0.90792000  | -0.08973400 | 1.86737400  |
| C | -2.10131000 | 0.13439900  | 0.22857600  |
| O | -2.13062700 | 1.26292400  | -0.27476300 |
| O | -3.16673200 | -0.71742600 | 0.10737600  |
| C | -4.27837000 | -0.20684300 | -0.62397500 |
| H | -3.99292000 | 0.05005700  | -1.65810900 |
| H | -4.69770800 | 0.69067100  | -0.13915700 |
| H | -5.02846900 | -1.01049100 | -0.63266000 |
| H | -1.07503900 | -1.50483600 | 1.24199400  |
| H | 0.70365200  | 0.74580500  | -1.06708400 |

**Cartesian coordinate for TS at F<sub>2</sub> catalyzed reaction at MN15-L/ aug-cc-pVTZ level of theory**

|   |             |             |             |
|---|-------------|-------------|-------------|
| C | -2.47788600 | -0.63933300 | 1.38074000  |
| C | -3.54271600 | -0.63250300 | 0.24829700  |
| C | -1.51671100 | 0.49683400  | 1.00520200  |
| H | -1.92835900 | -1.59566300 | 1.38461900  |
| H | -2.91540800 | -0.49688000 | 2.37947700  |
| N | -1.57037100 | 0.47267300  | -0.45386300 |
| H | -1.87496700 | 1.47310000  | 1.39182600  |
| H | -0.47860900 | 0.34771800  | 1.35158500  |
| C | -2.97400700 | 0.31885600  | -0.83227300 |
| H | -3.04886800 | -0.08212300 | -1.85804100 |
| H | -3.49099700 | 1.29994800  | -0.81057600 |
| H | -4.51922600 | -0.27177400 | 0.60439800  |

|   |             |             |             |
|---|-------------|-------------|-------------|
| H | -3.69270500 | -1.64552600 | -0.15741700 |
| C | -0.46069800 | -1.42117300 | -1.15754700 |
| C | 0.52132100  | -1.66986200 | -0.23117400 |
| H | -0.23283500 | -0.84912000 | -2.05950200 |
| H | -1.40191000 | -1.97738400 | -1.14265600 |
| C | 1.75401100  | -0.91911000 | -0.29385700 |
| O | 2.08320600  | -0.19420800 | -1.25000000 |
| O | 2.52189800  | -1.05078000 | 0.79698400  |
| C | 3.74914000  | -0.30257800 | 0.79194400  |
| H | 3.54036000  | 0.77472800  | 0.70457200  |
| H | 4.39257800  | -0.62250600 | -0.04264000 |
| H | 4.23167900  | -0.52458400 | 1.75228200  |
| H | 0.35277700  | -2.31937000 | 0.63155600  |
| H | -1.07425000 | 1.24309100  | -0.90746200 |
| F | 1.27429900  | 1.60242600  | -0.41218000 |
| F | 0.50100900  | 2.89876800  | 0.20230900  |

**Cartesian coordinate for TS at Cl<sub>2</sub> catalyzed reaction at MN15-L/ aug-cc-pVTZ level of theory**

|    |             |             |             |
|----|-------------|-------------|-------------|
| C  | -2.96016200 | -0.09468000 | 1.39617100  |
| C  | -3.97491400 | -0.13377600 | 0.22114000  |
| C  | -1.72583900 | 0.60322900  | 0.81218300  |
| H  | -2.68200200 | -1.11902300 | 1.69834700  |
| H  | -3.34945800 | 0.42554600  | 2.28290800  |
| N  | -1.75931500 | 0.15716100  | -0.58533200 |
| H  | -1.80527600 | 1.70675000  | 0.86535400  |
| H  | -0.77772700 | 0.28871800  | 1.28163300  |
| C  | -3.15853100 | 0.27526300  | -1.02892700 |
| H  | -3.32307100 | -0.38318200 | -1.89936300 |
| H  | -3.37746100 | 1.31566800  | -1.33077600 |
| H  | -4.81014000 | 0.56493700  | 0.37770900  |
| H  | -4.40326000 | -1.14129200 | 0.10258600  |
| C  | -1.18431400 | -1.74912100 | -0.72844700 |
| C  | -0.16708100 | -2.07865600 | 0.16738400  |
| H  | -0.92864400 | -1.60720900 | -1.78404800 |
| H  | -2.19422200 | -2.13525900 | -0.55120700 |
| C  | 1.19208900  | -1.76507800 | -0.15164800 |
| O  | 1.60208900  | -1.23687700 | -1.20242500 |
| O  | 2.06067300  | -2.10228600 | 0.84107300  |
| C  | 3.44212300  | -1.85962200 | 0.57012500  |
| H  | 3.63402200  | -0.78652700 | 0.40411900  |
| H  | 3.77701400  | -2.42433600 | -0.31547000 |
| H  | 3.98525600  | -2.20265800 | 1.46161500  |
| H  | -0.39248900 | -2.46092400 | 1.16613400  |
| H  | -1.10177700 | 0.66095400  | -1.18615100 |
| Cl | 1.62946600  | 1.27632200  | -0.43822000 |
| Cl | 1.42830600  | 3.17813000  | 0.25391800  |

**Cartesian coordinate for TS at Br<sub>2</sub> catalyzed reaction at MN15-L/ aug-cc-pVTZ level of theory**

|   |            |             |             |
|---|------------|-------------|-------------|
| C | 3.19557700 | -1.37646300 | 1.38592400  |
| C | 3.98073500 | -1.99130300 | 0.19571900  |
| C | 1.75535800 | -1.25942100 | 0.87282700  |
| H | 3.57585200 | -0.36643900 | 1.61632900  |
| H | 3.26140100 | -1.98032000 | 2.30216300  |
| N | 1.96517500 | -0.97791400 | -0.55167300 |
| H | 1.18819500 | -2.20269700 | 1.00043300  |

|    |             |             |             |
|----|-------------|-------------|-------------|
| H  | 1.18661300  | -0.43493400 | 1.33634400  |
| C  | 3.01630100  | -1.90144900 | -1.01177400 |
| H  | 3.48650700  | -1.49556400 | -1.92414400 |
| H  | 2.57931900  | -2.88763100 | -1.25280000 |
| H  | 4.25783800  | -3.03883700 | 0.38611800  |
| H  | 4.90992400  | -1.43223400 | 0.00416500  |
| C  | 2.59756900  | 0.92064700  | -0.80563800 |
| C  | 2.05617600  | 1.80688800  | 0.12393300  |
| H  | 2.20729300  | 0.92711200  | -1.82867700 |
| H  | 3.65070600  | 0.63354000  | -0.71537200 |
| C  | 0.76703600  | 2.38179600  | -0.09755400 |
| O  | 0.03841600  | 2.19918700  | -1.09675200 |
| O  | 0.36327800  | 3.19354700  | 0.91268800  |
| C  | -0.89369000 | 3.84928400  | 0.72708200  |
| H  | -1.71495300 | 3.11847100  | 0.64281400  |
| H  | -0.88002700 | 4.48035300  | -0.17639500 |
| H  | -1.03780400 | 4.47249700  | 1.62018400  |
| H  | 2.55377600  | 2.00262600  | 1.07697200  |
| H  | 1.10717200  | -1.03712000 | -1.10569700 |
| Br | -1.49699200 | 0.21726700  | -0.42470800 |
| Br | -2.67877900 | -1.69255700 | 0.25352700  |

**Cartesian coordinate for TS at I<sub>2</sub> catalyzed reaction at MN15-L/Aug.-cc-pVTZ for all atoms except I<sub>2</sub> and MN15-L/aug-cc-pVTZ-LanI2dZ for I<sub>2</sub> level of theory**

|   |             |             |             |
|---|-------------|-------------|-------------|
| C | 3.23136400  | -2.33442500 | 1.34366200  |
| C | 3.64990100  | -3.15054400 | 0.08944600  |
| C | 1.91592200  | -1.66067000 | 0.93906600  |
| H | 3.97788500  | -1.55106000 | 1.56310100  |
| H | 3.12372400  | -2.95463600 | 2.24508500  |
| N | 2.14196500  | -1.40406700 | -0.49437000 |
| H | 1.03667100  | -2.32166600 | 1.06312100  |
| H | 1.72039700  | -0.70343200 | 1.45122600  |
| C | 2.72670300  | -2.64192800 | -1.04695000 |
| H | 3.26086100  | -2.40445000 | -1.98406000 |
| H | 1.92672500  | -3.36821300 | -1.27779900 |
| H | 3.51247100  | -4.23241100 | 0.23784200  |
| H | 4.71174300  | -2.98952300 | -0.15604100 |
| C | 3.31005600  | 0.02355300  | -0.74896100 |
| C | 3.15399900  | 1.06040700  | 0.19340700  |
| H | 2.96011500  | 0.22380500  | -1.77112700 |
| H | 4.23925600  | -0.56266000 | -0.71295900 |
| C | 2.12649400  | 2.01767600  | 0.00119000  |
| O | 1.30768900  | 2.02541000  | -0.95490500 |
| O | 2.08034000  | 2.98151500  | 0.95233600  |
| C | 1.08773100  | 3.98972900  | 0.76668900  |
| H | 0.07068900  | 3.56486500  | 0.82846500  |
| H | 1.20407700  | 4.48561900  | -0.21098500 |
| H | 1.24187300  | 4.71041100  | 1.58196300  |
| H | 3.76828300  | 1.11149400  | 1.09454500  |
| H | 1.28245600  | -1.10148300 | -0.97009300 |
| I | -0.87720900 | 0.75337600  | -0.39169300 |
| I | -3.03502200 | -0.86576100 | 0.22704400  |

**Table S3.** The rate constant ( $\text{cm}^3 \cdot \text{molecule}^{-1} \cdot \text{s}^{-1}$ ) and tunneling corrections calculated at room temperature for the uncatalyzed/dihalogen  $\text{I}_2$  molecules-catalyzed nucleophilic attack of PYR  $\mathbf{R}_1$  and on the  $\beta$  conjugated carbon MA  $\mathbf{R}_2$ - $\text{I}_2$  in the DMC at MN15-L/aug-cc-pVTZ Level of theory.

| bimolecular reactions                                                         | No correction          |              | Wigner tunneling       |              | Eckart tunneling       |              |
|-------------------------------------------------------------------------------|------------------------|--------------|------------------------|--------------|------------------------|--------------|
|                                                                               | k                      | $\kappa$ (T) | k                      | $\kappa$ (T) | k                      | $\kappa$ (T) |
| $\mathbf{R}_1 + \mathbf{R}_2 \rightarrow \text{IN1}$                          | $6.74 \times 10^{-23}$ | 1.0          | $7.31 \times 10^{-23}$ | 1.08         | $7.39 \times 10^{-23}$ | 1.10         |
| $\mathbf{R}_1 + \mathbf{R}_2 - \text{I}_2 \rightarrow \text{IN} - \text{I}_2$ | $5.16 \times 10^{-20}$ | 1.0          | $5.52 \times 10^{-20}$ | 1.07         | $5.52 \times 10^{-20}$ | 1.07         |

**Table S4.** MN15-L/def2-TZVP global CDFT reactivity indices (in eV) at the GS of the reagents involved in the MAR. The values including DCM solvent effects are reported in parentheses.

| Species                      | $\mu$   | $\eta$ | $\omega$ | $N$    |
|------------------------------|---------|--------|----------|--------|
| $\mathbf{R}_1$               | -2.51   | 6.39   | 0.49     | 3.41   |
|                              | (-2.39) | (6.58) | (0.43)   | (3.45) |
| $\mathbf{R}_2$               | -4.47   | 5.03   | 1.98     | 2.14   |
|                              | (-4.41) | (5.14) | (1.89)   | (2.14) |
| $\mathbf{R}_2 - \text{F}_2$  | -5.33   | 3.62   | 3.92     | 1.99   |
|                              | (-5.42) | (3.32) | (4.41)   | (2.04) |
| $\mathbf{R}_2 - \text{Cl}_2$ | -5.06   | 4.38   | 2.92     | 1.87   |
|                              | (-5.15) | (4.13) | (3.21)   | (1.91) |
| $\mathbf{R}_2 - \text{Br}_2$ | -4.98   | 3.53   | 3.51     | 2.38   |
|                              | (-5.13) | (3.55) | (3.70)   | (2.22) |
| $\mathbf{R}_2 - \text{I}_2$  | -4.62   | 2.60   | 4.10     | 3.20   |
|                              | (-4.54) | (2.73) | (3.77)   | (3.22) |
